# Supplementary material
Source: PubMed Central journal article supplement (PMC6326529)
Supplement: ja7b11750_si_001.pdf [file ja7b11750_si_001.pdf]

## SUPPORTING INFORMATION

### A structural rationale for the enhanced catalysis of nonenzymatic RNA primer extension by a downstream oligonucleotide

Wen Zhang<sup>†,#</sup>, Chun Pong Tam<sup>†,‡</sup>, Lijun Zhou<sup>†,#</sup>, Seung Soo Oh<sup>†,#,||</sup>, Jiawei Wang<sup>§</sup> and Jack W. Szostak<sup>†,#,‡,\*</sup>

<sup>†</sup>Howard Hughes Medical Institute and Center for Computational and Integrative Biology, Massachusetts General Hospital, Boston, MA 02114, USA, <sup>#</sup>Department of Genetics, Harvard Medical School, Boston, MA 02114, USA, <sup>‡</sup>Department of Chemistry and Chemical Biology, Harvard University, Cambridge, MA 02138, USA and <sup>§</sup>School of Life Sciences, Tsinghua University, Beijing 100084, China

#### Table of contents

|                                                                    |      |
|--------------------------------------------------------------------|------|
| LC-MS spectrum of transcribed RNA                                  | s2   |
| Crystallization procedures and conditions                          | s2-3 |
| Data collection and structure refinement procedures and statistics | s3-5 |
| References                                                         | s5   |

## 1. LC-MS analysis.

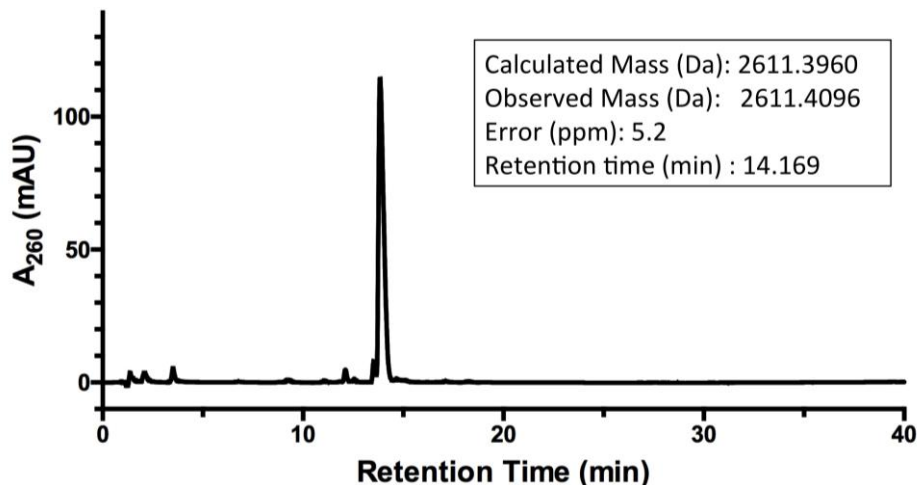

Figure S1. Reversed-phase HPLC analysis of transcript RNA 8mer 5'-ICG-CACCUCA-3' after purified by PAGE-gel. The HPLC analysis was performed on a Xbridge-C18 column (1.0 x 100 mm) with a linear gradient from buffer A (200 mM 1,1,1,3,3,3-hexafluoro-2-propanol with 1.25 mM triethylamine, pH 7.0) to 15% buffer B (Methanol) in 16 min; the RNA retention time was 14.169 min.

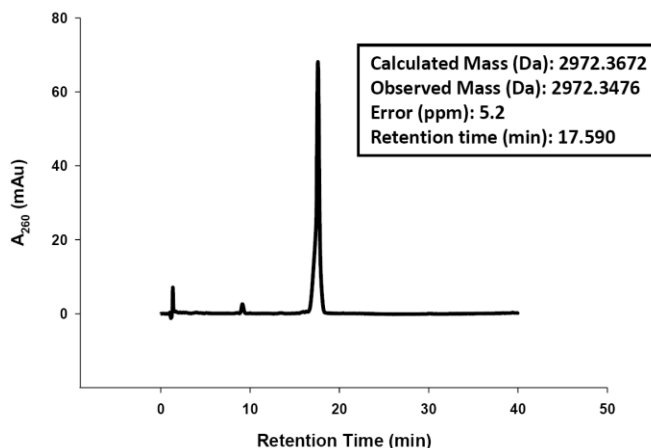

Figure S2. Reversed-phase HPLC analysis of transcript RNA 9mer 5'-GpppG-CACCUCA-3' after purified by PAGE-gel. The HPLC analysis was performed on a Xbridge-C18 column (1.0 x 100 mm) with a linear gradient from buffer A (200 mM 1,1,1,3,3,3-hexafluoro-2-propanol with 1.25 mM triethylamine, pH 7.0) to 20% buffer B (Methanol) in 20 min; the RNA retention time was 17.590 min.

## 2. X-ray crystallography.

**2a. Crystallization.** Nucleic Acid Mini Screen Kit, Natrix High Throughput Kit and Index High Throughput Kit (Hampton Research, Aliso Viejo, CA), and JBS Classic HTS II (Jena Biosciences, Jena, Germany) were used for screening crystallization conditions by the sitting drop vapor diffusion method. For RNA duplex-monomer crystallization, RNA samples (1 mM) were mixed with ICG (50 mM) at a 1:1 ratio. For RNA hairpin-monomer/RNA hairpin-GpppG crystallization, RNA template (1 mM), RNA downstream helper oligomer (1 mM) and ICG monomer/GpppG ligand (75 mM) were mixed at a 1:1:1 ratio. For crystallization of the RNA hairpin complex, the RNA template-loop-primer strand (0.5 mM) and the downstream GpppG-helper oligomer strand (0.5 mM) were mixed at a 1:1 ratio. All the components were heated to 80°C for 2 min, and then cooled down

slowly to room temperature. All crystals grew at 18°C. For RNA duplex-monomer complexes, 35% MPD was used as cryoprotectant during crystal mounting. For all other complexes, the mother liquor containing 50% glycerol was used as cryoprotectant during crystal mounting. The optimized crystallization conditions are listed below.

**Table S1. Optimized conditions for crystallization**

| Optimized crystallization conditions       |                                                                                                                                        |
|--------------------------------------------|----------------------------------------------------------------------------------------------------------------------------------------|
| <i>RNA 15mer-ICG</i><br>(PDB: 5V0H)        | 50 mM MgCl <sub>2</sub> , 0.05 M ammonium acetate, 0.05 M tris hydrochloride pH 7.5, 10% v/v (+/-)-2-methyl-2,4-pentanediol            |
| <i>RNA 14mer-ICG</i><br>(PDB: 5V0J)        | 50 mM MgCl <sub>2</sub> , 0.1 M potassium chloride, 0.05 M sodium chloride, 0.1 M HEPES pH 7.5, 15% v/v (+/-)-2-methyl-2,4-pentanediol |
| <i>RNA H-34-IM</i><br>(PDB: 5UX3)          | 50 mM MgCl <sub>2</sub> , 3 M ammonia sulfate, 100 mM HEPES 7.5                                                                        |
| <i>RNA H-34-PO</i><br>(PDB: 5V9Z)          | 50 mM MgCl <sub>2</sub> , 3 M ammonia sulfate, 100 mM HEPES 7.5                                                                        |
| <i>RNA H-34-OH</i><br>(PDB: 5V0O)          | 50 mM MgCl <sub>2</sub> , 3 M ammonia sulfate, 100 mM HEPES 7.5                                                                        |
| <i>RNA H-35-OH</i><br>(PDB: 5VCF)          | 50 mM MgCl <sub>2</sub> , 0.2 M lithium sulfate monohydrate, 0.1 M BIS-TRIS pH 7.0, 25% w/v Polyethylene glycol 3,350                  |
| <i>RNA H-35-PO</i><br>(PDB: 5VCI)          | 50 mM MgCl <sub>2</sub> , 0.2 M lithium sulfate monohydrate, 0.1 M BIS-TRIS pH 7.0, 25% w/v Polyethylene glycol 3,350                  |
| <i>RNA H-43-GpppG</i><br>(PDB: 6AZ4)       | 50 mM MgCl <sub>2</sub> , 0.1 M Sodium cacodylate trihydrate pH 6.5, 1.4 M Sodium acetate trihydrate                                   |
| <i>RNA H-34-GpppG-oligo</i><br>(PDB: 6BMD) | 50 mM MgCl <sub>2</sub> , 3 M ammonia sulfate, 100 mM HEPES 7.5                                                                        |
| <i>RNA H-34-L</i><br>(PDB: 5UZ6)           | 50 mM MgCl <sub>2</sub> , 3 M ammonia sulfate, 100 mM HEPES 7.5                                                                        |
| <i>RNA H-35-L</i><br>(PDB: 5VGW)           | 50 mM MgCl <sub>2</sub> , 0.2 M lithium sulfate monohydrate, 0.1 M BIS-TRIS pH 7.0, 25% w/v Polyethylene glycol 3,350                  |

**2b. Data collection and structure refinement.** All data collection was taken under a stream of nitrogen at 99 K. The data sets were collected at the SIBYLS beamline 821 and 822 at the Advanced Light Source, Lawrence Berkeley National Laboratory. The distances between detector and the crystal were set to 200-300 mm and the collecting wavelength was set to 1 Å. The crystals were exposed for 1 second per image with one degree oscillation, and 180 images were taken for each data set. The data was processed using HKL2000.<sup>1</sup> All the structures were solved by molecular replacement.<sup>2</sup> The RNA models were from our previously reported structures, or based on RNA hairpin structure in the literature. All the structures were refined using Refmac.<sup>3</sup> The refinement protocol included simulated annealing, refinement, restrained B-factor refinement, and bulk solvent correction. During refinement, the topologies and parameters for locked nucleic acids and for the ligand ICG and GpppG (LCC, LCA, LCG, rIMG, GP3) were constructed and applied. After several cycles of refinement, the water and magnesium atoms were added. Data collection, phasing, and refinement statistics of the determined structures are listed in Tables S2 and S3.

**Table S2. Data collection statistics.**

| Structure                                  | RNA 15mer-ICG                      | RNA 14mer-ICG                       | H-34-Im complex                    | H-34-PO complex                    |
|--------------------------------------------|------------------------------------|-------------------------------------|------------------------------------|------------------------------------|
| <b>PDB code</b>                            | 5V0H                               | 5V0J                                | 5UX3                               | 5V9Z                               |
| <b>Space group</b>                         | P321                               | R32                                 | P4 <sub>1</sub> 2 <sub>1</sub> 2   | P4 <sub>3</sub> 2 <sub>1</sub> 2   |
| <b>Unit cell parameters</b><br>(Å, °)      | 42.85, 42.85, 83.84<br>90, 90, 120 | 43.39, 43.39, 253.85<br>90, 90, 120 | 46.53, 46.53, 156.94<br>90, 90, 90 | 45.28, 45.28, 154.57<br>90, 90, 90 |
| <b>Resolution range, Å</b><br>(last shell) | 50-1.90 (1.97-1.90)                | 100-1.50 (1.53-1.50)                | 50-2.50 (2.59-2.50)                | 50-2.50 (2.59-2.50)                |
| <b>Unique reflections</b>                  | 7272 (702)                         | 15290 (744)                         | 6436 (604)                         | 5769 (418)                         |
| <b>Completeness, %</b>                     | 97.4 (95.4)                        | 99.4 (99.9)                         | 98.7 (94.1)                        | 95.4 (73.1)                        |
| <b>R<sub>merge</sub>, %</b>                | 13.7 (46.8)                        | 4.1 (57.5)                          | 8.0 (69.5)                         | 10.0 (71.0)                        |
| <b>&lt;I/σ(I)&gt;</b>                      | 10 (2.9)                           | 35.4 (1.8)                          | 20.2 (1.0)                         | 16.3 (1.7)                         |
| <b>Redundancy</b>                          | 7.3 (4.2)                          | 6.3 (5.6)                           | 5.1 (3.9)                          | 10.6 (7.2)                         |

| Structure                                  | H-34-OH complex                    | H-35-OH complex                    | H-35-PO complex                    | H-43-GpppG complex                |
|--------------------------------------------|------------------------------------|------------------------------------|------------------------------------|-----------------------------------|
| <b>PDB code</b>                            | 5V0O                               | 5VCF                               | 5VCI                               | 6AZ4                              |
| <b>Space group</b>                         | P4 <sub>3</sub> 2 <sub>1</sub> 2   | R3                                 | R3                                 | P4 <sub>1</sub> 2 <sub>1</sub> 2  |
| <b>Unit cell parameters</b><br>(Å, °)      | 44.75, 44.75, 154.20<br>90, 90, 90 | 71.07, 71.07, 71.27<br>90, 90, 120 | 69.61, 69.61, 70.85<br>90, 90, 120 | 79.39, 79.39, 73.65<br>90, 90, 90 |
| <b>Resolution range, Å</b><br>(last shell) | 50-2.70 (2.80-2.70)                | 50-2.80 (2.90-2.80)                | 50-2.60 (2.69-2.60)                | 50-2.98 (3.09-2.98)               |
| <b>Unique reflections</b>                  | 4657 (437)                         | 3296 (316)                         | 3864 (338)                         | 4713 (476)                        |
| <b>Completeness, %</b>                     | 97.3 (94.4)                        | 99.7 (100)                         | 97.8 (87.8)                        | 91.6 (95.2)                       |
| <b>R<sub>merge</sub>, %</b>                | 10.0 (77.7)                        | 7.2 (49.5)                         | 5.4 (52.6)                         | 13.3 (69.8)                       |
| <b>&lt;I/σ(I)&gt;</b>                      | 18.2 (1.6)                         | 17.4 (1.5)                         | 18.4 (1.8)                         | 9.2 (1.6)                         |
| <b>Redundancy</b>                          | 9.1 (6.4)                          | 3.3 (3.3)                          | 3.2 (2.4)                          | 4.5 (4.4)                         |

| Structure                                  | H-34-GpppG-oligo complex            | H-34-L complex                      | H-35-L complex                     |
|--------------------------------------------|-------------------------------------|-------------------------------------|------------------------------------|
| <b>PDB code</b>                            | 6BMD                                | 5UZ6                                | 5VGW                               |
| <b>Space group</b>                         | C2                                  | C2                                  | R3                                 |
| <b>Unit cell parameters</b><br>(Å, °)      | 107.39, 63.76, 65.84<br>90, 122, 90 | 106.69, 63.07, 65.92<br>90, 120, 90 | 71.06, 71.06, 69.78<br>90, 90, 120 |
| <b>Resolution range, Å</b><br>(last shell) | 50-3.00 (3.11-3.00)                 | 50-2.10 (2.18-2.10)                 | 50-2.40 (2.49-2.40)                |
| <b>Unique reflections</b>                  | 7315 (557)                          | 20855 (1912)                        | 4799 (508)                         |
| <b>Completeness, %</b>                     | 95.9 (74.5)                         | 96.9 (89.0)                         | 96.1 (98.8)                        |
| <b>R<sub>merge</sub>, %</b>                | 19.0 (37.7)                         | 5.2 (32.3)                          | 7.3 (63.9)                         |
| <b>&lt;I/σ(I)&gt;</b>                      | 5.8 (2.0)                           | 15.5 (1.8)                          | 15.0 (2.3)                         |
| <b>Redundancy</b>                          | 4.8 (3.2)                           | 2.7 (2.0)                           | 3.7 (3.1)                          |

**Table S3. Structure refinement statistics.**

| Structure                               | RNA 15mer-ICG | RNA 14mer-ICG | H-34-Im complex | H-34-PO complex |
|-----------------------------------------|---------------|---------------|-----------------|-----------------|
| <b>PDB code</b>                         | 5V0H          | 5V0J          | 5UX3            | 5V9Z            |
| <b>Molecules per asymmetric unit</b>    | 1             | 1             | 1               | 1               |
| <b>Resolution range, Å (last shell)</b> | 37.11-1.90    | 84.62-1.50    | 44.61-2.50      | 43.45-2.51      |
| <i>R</i> <sub>work</sub> , %            | 22.7          | 23.7          | 21.8            | 21.8            |
| <i>R</i> <sub>free</sub> , %            | 27.2          | 27.0          | 26.1            | 28.1            |
| <b>Number of reflections</b>            | 6924          | 14527         | 6154            | 5466            |
| <b>Bond length R.M.S., Å</b>            | 0.026         | 0.027         | 0.015           | 0.013           |
| <b>Bond angle R.M.S.</b>                | 2.686         | 2.963         | 2.564           | 2.438           |
| <b>Average B-factors, Å<sup>2</sup></b> | 43.86         | 36.47         | 77.74           | 73.17           |

| Structure                               | H-34-OH complex | H-35-OH complex | H-35-PO complex | H-43-GpppG complex |
|-----------------------------------------|-----------------|-----------------|-----------------|--------------------|
| <b>PDB code</b>                         | 5V0O            | 5VCF            | 5VCI            | 6AZ4               |
| <b>Molecules per asymmetric unit</b>    | 1               | 1               | 1               | 1                  |
| <b>Resolution range, Å (last shell)</b> | 42.97-2.70      | 46.58-2.80      | 45.91-2.60      | 50.00-2.98         |
| <i>R</i> <sub>work</sub> , %            | 21.8            | 16.3            | 16.2            | 18.1               |
| <i>R</i> <sub>free</sub> , %            | 27.7            | 21.3            | 21.2            | 20.7               |
| <b>Number of reflections</b>            | 4446            | 3154            | 3649            | 4464               |
| <b>Bond length R.M.S., Å</b>            | 0.012           | 0.009           | 0.010           | 0.009              |
| <b>Bond angle R.M.S.</b>                | 1.781           | 1.890           | 1.787           | 2.185              |
| <b>Average B-factors, Å<sup>2</sup></b> | 86.79           | 64.45           | 75.43           | 73.20              |

| Structure                               | H-34-GpppG-oligo complex | H-34-L complex | H-35-L complex |
|-----------------------------------------|--------------------------|----------------|----------------|
| <b>PDB code</b>                         | 6BMD                     | 5UZ6           | 5VGW           |
| <b>Molecules per asymmetric unit</b>    | 3                        | 3              | 1              |
| <b>Resolution range, Å (last shell)</b> | 50.00-3.00               | 50.00-2.10     | 46.15-2.42     |
| <i>R</i> <sub>work</sub> , %            | 18.3                     | 22.1           | 20.73          |
| <i>R</i> <sub>free</sub> , %            | 23.0                     | 26.7           | 21.29          |
| <b>Number of reflections</b>            | 6922                     | 19827          | 4546           |
| <b>Bond length R.M.S., Å</b>            | 0.012                    | 0.014          | 0.008          |
| <b>Bond angle R.M.S.</b>                | 2.060                    | 2.452          | 1.755          |
| <b>Average B-factors, Å<sup>2</sup></b> | 26.41                    | 47.84          | 68.15          |

**3. References.**

- (1) Otwinowski, Z.; Minor, W. *Methods Enzymol.* **1997**, *276*, 307-326.
- (2) McCoy, A. J.; Grosse-Kunstleve, R. W.; Adams, P. D.; Winn, M. D.; Storoni, L. C.; Read, R. J. *J. Appl. Crystallogr.* **2007**, *40*, 658-674.
- (3) Murshudov, G. N.; Vagin, A. A.; Dodson, E. J. *Acta Crystallogr. D* **1997**, *53*, 240-255.
